# Supplementary material for: Room-temperature electrochemically deposited polycrystalline SnO2 with adjustable work function for high-efficiency perovskite solar cells
Source: Royal Society of Chemistry journal article supplement (doi:10.1039/d2ta08258f), 2022-12-01
Supplement: d2ta08258f1.pdf [file d2ta08258f1.pdf]

## Supplementary Information

### **Room-temperature electrochemical deposited polycrystalline SnO<sub>2</sub> with adjustable work function for high-efficiency perovskite solar cells**

Yapeng Sun, Jiankai Zhang, Huangzhong Yu\*

School of Physics and Optoelectronics, South China University of Technology, 510640

Guangzhou, China

\*To whom correspondence should be addressed. E-mail: hzhyu@scut.edu.cn.

**This PDF file includes:**

Figs. S1 to S11

Tables S1 to S7

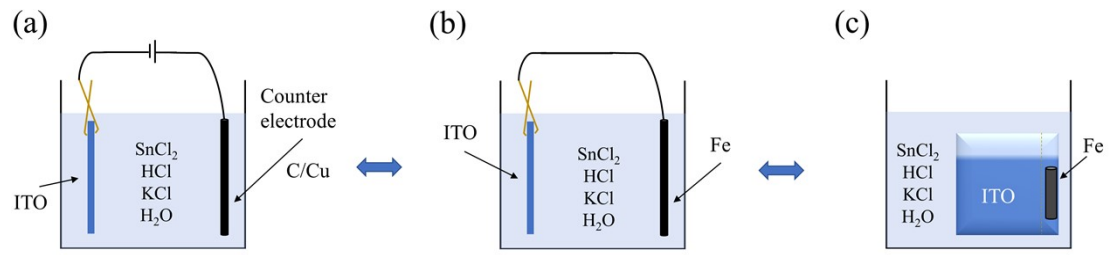

**Fig. S1.** (a-c) Equivalence principle schematic diagram of the deposition process.

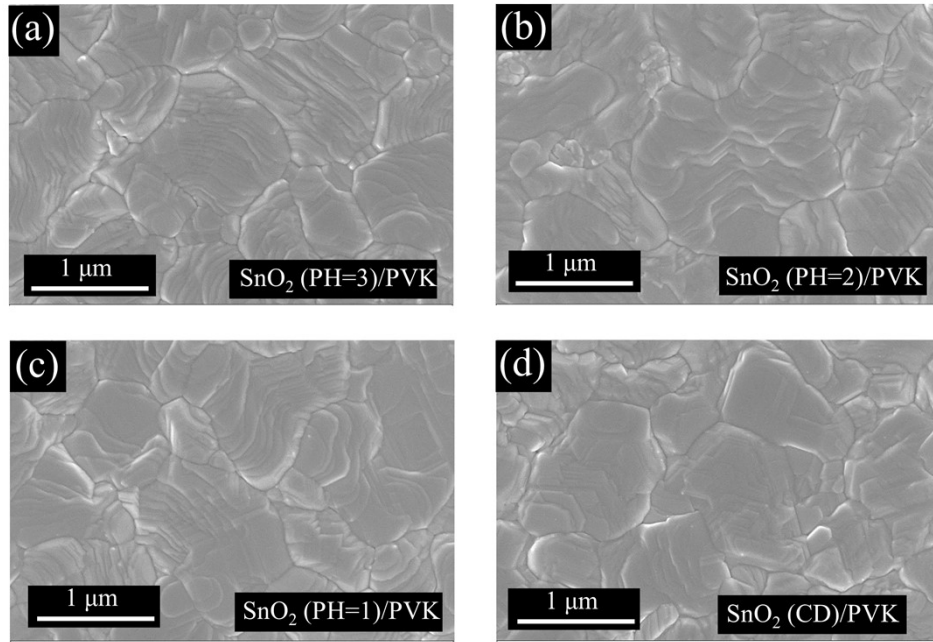

**Fig. S2.** (a-d) The SEM images of perovskite films on different SnO<sub>2</sub> films.

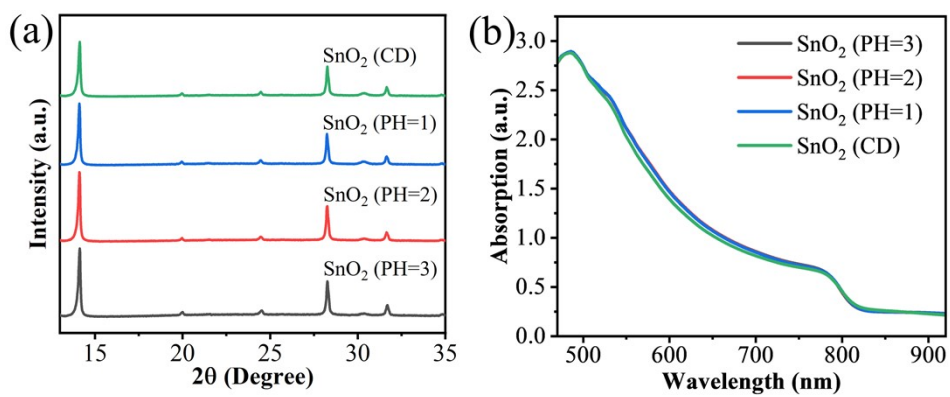

**Fig. S3.** (a) The XRD patterns and (b) the absorption spectra of perovskite films on different SnO<sub>2</sub> films.

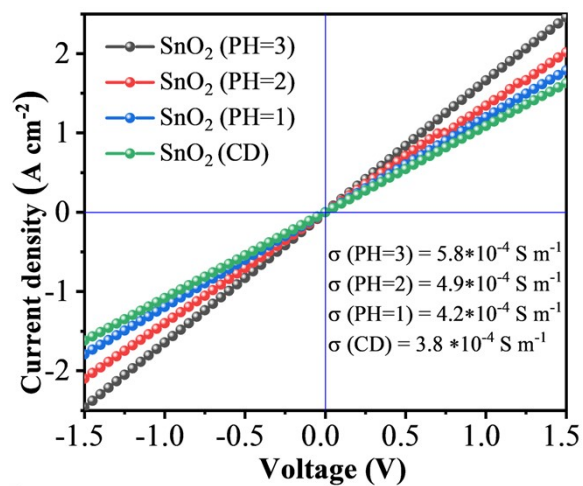

Fig. S4. The conductivity test of SnO<sub>2</sub> films using the  $J$ - $V$  curves.

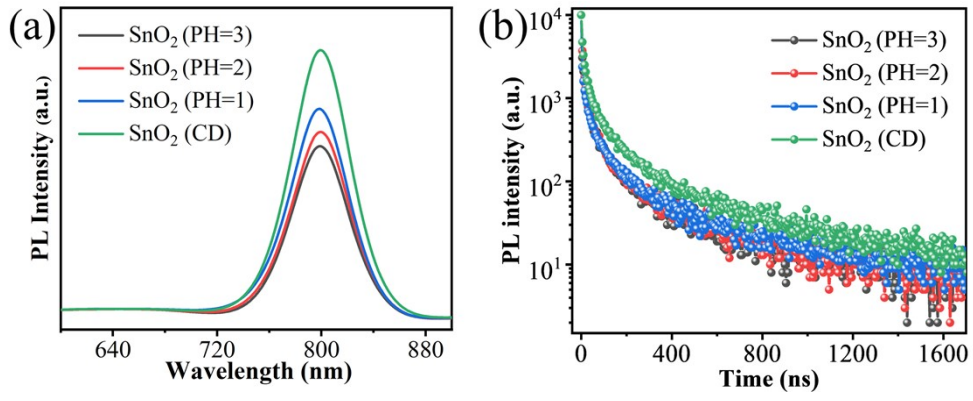

**Fig. S5.** (a) The PL curves and (b) the TRPL curves of perovskite films on different SnO<sub>2</sub> films.

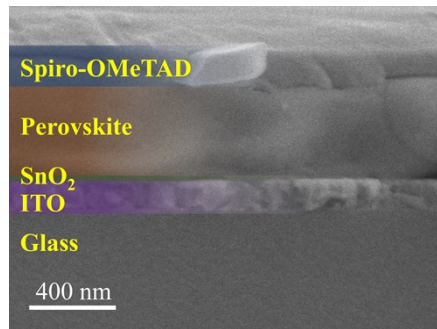

**Fig. S6.** The cross-sectional SEM image of device.

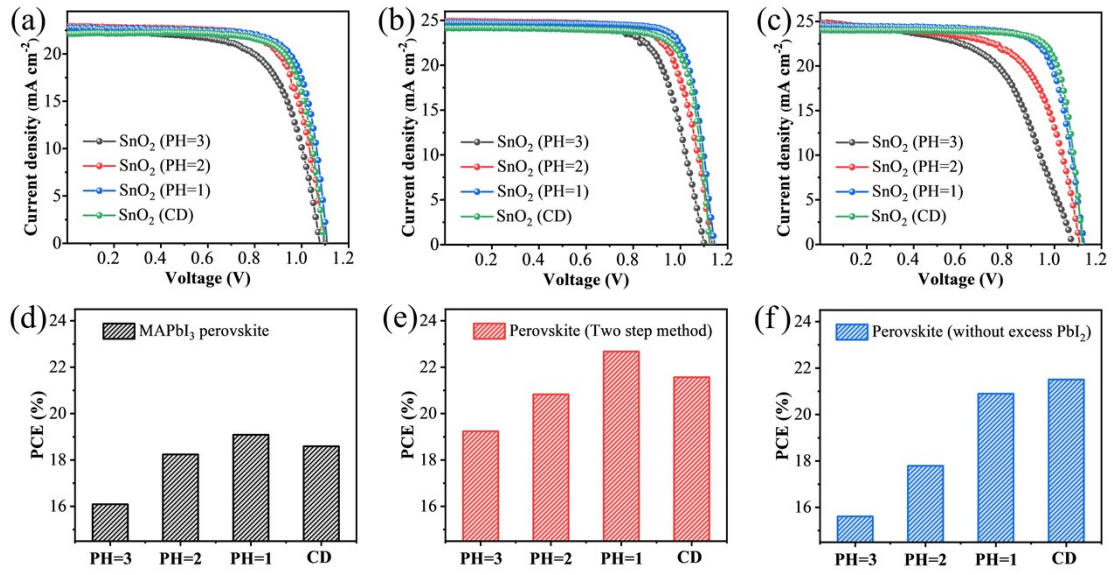

**Fig. S7.** (a) The reverse scanning  $J-V$  curves and (d) the PCE for MAPbI<sub>3</sub> devices based on different SnO<sub>2</sub> films. (b) The reverse scanning  $J-V$  curves and (e) the PCE for two-step method (FAPbI<sub>3</sub>)<sub>0.93</sub>(MAPbI<sub>3</sub>)<sub>0.07</sub> perovskite devices based on different SnO<sub>2</sub> films. (c) The reverse scanning  $J-V$  curves and (f) the PCE for FAPbI<sub>3</sub> perovskite without excess PbI<sub>2</sub> devices based on different SnO<sub>2</sub> films.



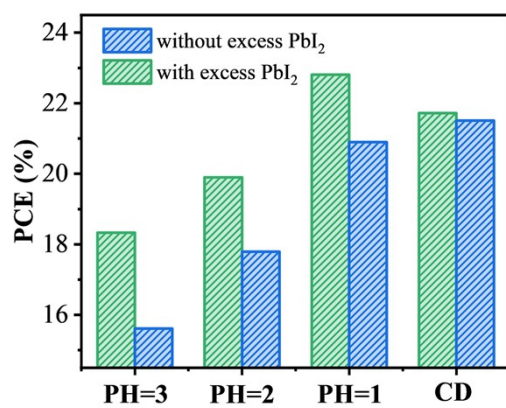

**Fig. S8.** The comparison figure of the device performance before and after adding excessive PbI<sub>2</sub> for different SnO<sub>2</sub> films.

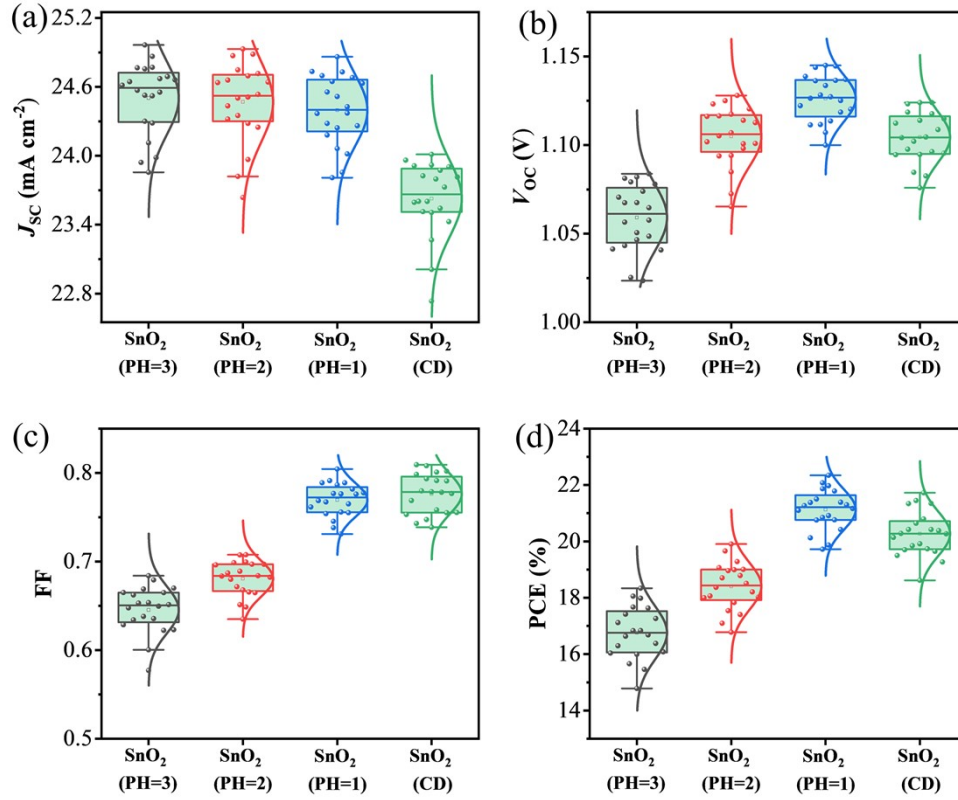

**Fig. S9.** (a-d) The photovoltaic parameters statistics chart for devices based on different SnO<sub>2</sub> films.

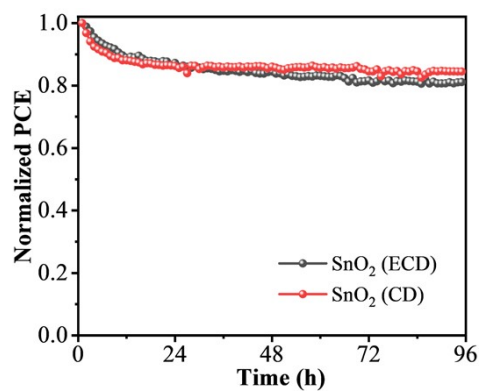

**Fig. S10.** Maximum power point tracking for device with different SnO<sub>2</sub> preparation methods measured under 1 Sun illumination without ultraviolet filter.

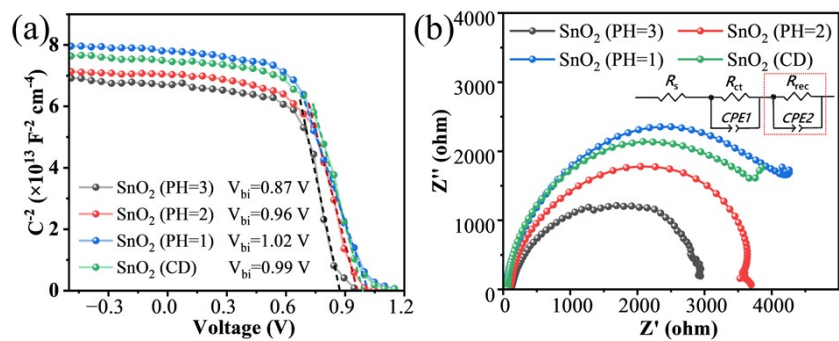

**Fig. S11.** (a) Mott-Schottky fitting to the  $C^{-2}$ - $V$  curves of different devices. (b) Nyquist plots of different devices measured in the dark.

**Table S1.** Comparison the performance of the state-of-the-art PSCs of the low temperature prepared SnO<sub>2</sub> reported in the literature (PCEs denote champion values).

| Preparation method                                                   | <i>PCE</i><br>(%) | <i>J</i> <sub>SC</sub><br>(mA cm <sup>-2</sup> ) | <i>V</i> <sub>OC</sub><br>(mV) | FF<br>(%) | Temperat<br>-ure (°C) | Year | Ref.      |
|----------------------------------------------------------------------|-------------------|--------------------------------------------------|--------------------------------|-----------|-----------------------|------|-----------|
| <b>Electrochemical Deposited</b>                                     | 22.85             | 24.83                                            | 1144                           | 80.44     | <b>25</b>             | -    | This work |
| <b>Commercially Colloidal Dispersion</b>                             | 21.72             | 23.92                                            | 1124                           | 80.09     | 150                   | -    | This work |
| <b>Cd-SnO<sub>2</sub> nanocrystals</b>                               | 21.73             | 23.81                                            | 1090                           | 84.00     | 90                    | 2022 | 1         |
| <b>Mesoporous SnO<sub>2</sub> and RbF modification</b>               | 22.72             | 24.50                                            | 1148                           | 82.10     | 180                   | 2021 | 2         |
| <b>Vacuum-assisted annealed SnO<sub>2</sub> Colloidal Dispersion</b> | 20.14             | 22.76                                            | 1140                           | 77.62     | 100                   | 2022 | 3         |
| <b>MXene-SnO<sub>2</sub> Colloidal Dispersion</b>                    | 19.14             | 24.16                                            | 1070                           | 74.05     | 150                   | 2020 | 4         |
| <b>Non-Aqueous One-Pot SnO<sub>2</sub> Nanoparticle Inks</b>         | 18.40             | 21.88                                            | 1120                           | 75.00     | 140                   | 2022 | 5         |
| <b>Heterophase SnO<sub>2</sub> Electron Transport Bilayer</b>        | 20.39             | 23.26                                            | 1125                           | 77.92     | 190                   | 2020 | 6         |
| <b>HEPES-Au NSs-modified SnO<sub>2</sub> Colloidal Dispersion</b>    | 21.13             | 23.12                                            | 1150                           | 79.04     | 150                   | 2022 | 7         |
| <b>Zr/F Co-Doped SnO<sub>2</sub></b>                                 | 19.19             | 24.39                                            | 1105                           | 71.20     | 200                   | 2020 | 8         |
| <b>Compact SnO<sub>2</sub> layer @ SnO<sub>2</sub> nanosheets</b>    | 16.17             | 22.76                                            | 1050                           | 68.00     | 95                    | 2016 | 9         |
| <b>Energetically favored formation of SnO<sub>2</sub></b>            | 19.20             | 22.20                                            | 1170                           | 74.00     | 80                    | 2017 | 10        |
| <b>Atomically Coherent Interlayers on</b>                            | 25.50             | 25.74                                            | 1189                           | 83.20     | 190                   | 2021 | 11        |
| <b>Chemical Bath Deposition</b>                                      | 25.20             | 25.14                                            | 1181                           | 84.80     | 170                   | 2021 | 12        |
| <b>Conformal Quantum dot-SnO<sub>2</sub></b>                         | 25.39             | 26.28                                            | 1177                           | 81.49     | 100                   | 2022 | 13        |

**Table S2.** The average surface potentials of different SnO<sub>2</sub> films.

|                  | <b>SnO<sub>2</sub> (PH=3)</b> | <b>SnO<sub>2</sub> (PH=2)</b> | <b>SnO<sub>2</sub> (PH=1)</b> | <b>SnO<sub>2</sub> (CD)</b> |
|------------------|-------------------------------|-------------------------------|-------------------------------|-----------------------------|
| <b>KPFM (eV)</b> | 4.32                          | 4.46                          | 4.55                          | 4.68                        |

**Table S3.** Energy band parameters of different SnO<sub>2</sub> films.

|                          | SnO <sub>2</sub> (PH=3) | SnO <sub>2</sub> (PH=2) | SnO <sub>2</sub> (PH=1) | SnO <sub>2</sub> (CD) |
|--------------------------|-------------------------|-------------------------|-------------------------|-----------------------|
| $E_{\text{cutoff}}$ (eV) | 16.99                   | 16.86                   | 16.72                   | 16.59                 |
| $W_{\text{F}}$ (eV)      | 4.23                    | 4.36                    | 4.50                    | 4.63                  |
| $E_{\text{onset}}$ (eV)  | 3.53                    | 3.50                    | 3.46                    | 3.40                  |
| $E_{\text{VB}}$ (eV)     | -7.76                   | -7.86                   | -7.96                   | -8.03                 |
| $E_{\text{CB}}$ (eV)     | -4.13                   | -4.20                   | -4.29                   | -4.35                 |

**Table S4.** Results of the double exponential fitting of TRPL spectra.

| <b>Sample</b>                 | <b>A<sub>1</sub> (%)</b> | <b><math>\tau_1</math> (ns)</b> | <b>A<sub>2</sub> (%)</b> | <b><math>\tau_2</math> (ns)</b> | <b><math>\tau</math> (ns)</b> |
|-------------------------------|--------------------------|---------------------------------|--------------------------|---------------------------------|-------------------------------|
| <b>SnO<sub>2</sub> (PH=3)</b> | 91.23                    | 25.87                           | 8.77                     | 196.78                          | 98.06                         |
| <b>SnO<sub>2</sub> (PH=2)</b> | 93.06                    | 27.64                           | 6.93                     | 231.23                          | 105.79                        |
| <b>SnO<sub>2</sub> (PH=1)</b> | 89.75                    | 26.57                           | 10.25                    | 212.45                          | 115.29                        |
| <b>SnO<sub>2</sub> (CD)</b>   | 88.83                    | 37.17                           | 11.17                    | 251.57                          | 135.73                        |



**Table S5.** Photovoltaic performances of MAPbI<sub>3</sub> devices based on different SnO<sub>2</sub> films.

| <b>Material</b>         | <b><math>J_{SC}</math> (mA cm<sup>-2</sup>)</b> | <b><math>V_{OC}</math> (mV)</b> | <b>FF (%)</b> | <b>PCE (%)</b> |
|-------------------------|-------------------------------------------------|---------------------------------|---------------|----------------|
| SnO <sub>2</sub> (PH=3) | 22.79                                           | 1077                            | 65.55         | 16.09          |
| SnO <sub>2</sub> (PH=2) | 22.93                                           | 1100                            | 72.31         | 18.24          |
| SnO <sub>2</sub> (PH=1) | 22.75                                           | 1109                            | 75.66         | 19.09          |
| SnO <sub>2</sub> (CD)   | 22.16                                           | 1094                            | 76.68         | 18.59          |

**Table S6.** Photovoltaic performances of two step method (FAPb I<sub>3</sub>)<sub>0.93</sub>(MAPbI<sub>3</sub>)<sub>0.07</sub> perovskite devices based on different SnO<sub>2</sub> films.

| <b>Material</b>         | <b><math>J_{SC}</math> (mA cm<sup>-2</sup>)</b> | <b><math>V_{OC}</math> (mV)</b> | <b>FF (%)</b> | <b>PCE (%)</b> |
|-------------------------|-------------------------------------------------|---------------------------------|---------------|----------------|
| SnO <sub>2</sub> (PH=3) | 24.66                                           | 1101                            | 70.86         | 19.24          |
| SnO <sub>2</sub> (PH=2) | 24.91                                           | 1134                            | 73.74         | 20.83          |
| SnO <sub>2</sub> (PH=1) | 24.73                                           | 1145                            | 80.10         | 22.68          |
| SnO <sub>2</sub> (CD)   | 24.17                                           | 1124                            | 79.40         | 21.57          |

**Table S7.** Photovoltaic performances of FAPbI<sub>3</sub> perovskite without excess PbI<sub>2</sub> devices based on different SnO<sub>2</sub> films.

| <b>Material</b>         | <b><math>J_{SC}</math> (mA cm<sup>-2</sup>)</b> | <b><math>V_{OC}</math> (mV)</b> | <b>FF (%)</b> | <b>PCE (%)</b> |
|-------------------------|-------------------------------------------------|---------------------------------|---------------|----------------|
| SnO <sub>2</sub> (PH=3) | 24.84                                           | 1074                            | 58.51         | 15.61          |
| SnO <sub>2</sub> (PH=2) | 24.78                                           | 1108                            | 64.79         | 17.79          |
| SnO <sub>2</sub> (PH=1) | 24.53                                           | 1128                            | 75.53         | 20.90          |
| SnO <sub>2</sub> (CD)   | 24.02                                           | 1119                            | 80.03         | 21.51          |

## References

- 1 J. X. Zhong, W. Q. Wu, Y. Zhou, Q. Dong, P. Wang, H. Ma, Z. Wang, C. Y. Yao, X. Chen, G. L. Liu, Y. Shi, D. B. Kuang, *Adv. Funct. Mater.*, 2022, **32**, 2200817.
- 2 Q. Chen, C. Peng, L. Du, T. Hou, W. Yu, D. Chen, H. Shu, D. Huang, X. Zhou, J. Zhang, W. Zhang, H. Li, J. Xie, Y. Huang, *J. Energy Chem.*, 2022, **66**, 250-259.
- 3 X. Li, Z. Shi, F. Behrouznejad, M. Hatamvand, X. Zhang, Y. Wang, F. Liu, H. Wang, K. Liu, H. Dong, F. Mudasar, J. Wang, A. Yu, Y. Zhan, *J. Energy Chem.*, 2022, **67**, 1-7.
- 4 L. Huang, X. Zhou, R. Xue, P. Xu, S. Wang, C. Xu, W. Zeng, Y. Xiong, H. Sang, D. Liang, *Nano-Micro Lett.*, 2020, **12**, 44.
- 5 T. a. N. Peiris, H. C. Weerasinghe, M. Sharma, J.-E. Kim, M. Michalska, N. Chandrasekaran, D. C. Senevirathna, H. Li, A. S. R. Chesman, D. Vak, J. J. Jasieniak, *Chem. Mater.*, 2022, **34**, 5535-5545.
- 6 H. B. Lee, N. Kumar, M. M. Ovhal, Y. J. Kim, Y. M. Song, J.-W. Kang, *Adv. Funct. Mater.*, 2020, **30**, 2001559.
- 7 L. Fan, P. Wang, M. Wang, W. Lü, F. Wang, H. Liu, J. Yang, L. Yang, *Chem. Eng. J.*, 2022, **427**, 131832.
- 8 J. Tian, J. Zhang, X. Li, B. Cheng, J. Yu, W. Ho, *Sol. RRL*, 2020, **4**, 2000090.
- 9 Q. Liu, M.-C. Qin, W.-J. Ke, X.-L. Zheng, Z. Chen, P.-L. Qin, L.-B. Xiong, H.-W. Lei, J.-W. Wan, J. Wen, G. Yang, J.-J. Ma, Z.-Y. Zhang, G.-J. Fang, *Adv. Funct. Mater.*, 2016, **26**, 6069-6075.
- 10 Q. Dong, Y. Shi, C. Zhang, Y. Wu, L. Wang, *Nano Energy*, 2017, **40**, 336-344.
- 11 H. Min, D. Y. Lee, J. Kim, G. Kim, K. S. Lee, J. Kim, M. J. Paik, Y. K. Kim, K. S. Kim, M. G. Kim, T. J. Shin, S. Il Seok, *Nature*, 2021, **598**, 444-450.
- 12 J. J. Yoo, G. Seo, M. R. Chua, T. G. Park, Y. Lu, F. Rotermund, Y. K. Kim, C. S. Moon, N. J. Jeon, J. P. Correa-Baena, V. Bulovic, S. S. Shin, M. G. Bawendi, J. Seo, *Nature*, 2021, **590**, 587-593.
- 13 M. Kim, J. Jeong, H. Lu, T. K. Lee, F. T. Eickemeyer, Y. Liu, I. W. Choi, S. J. Choi, Y. Jo, H. B. Kim, S. I. Mo, Y. K. Kim, H. Lee, N. G. An, S. Cho, W. R. Tress, S. M. Zakeeruddin, A. Hagfeldt, J. Y. Kim, M. Gratzel, D. S. Kim, *Science*, 2022, **375**, 302-306.
